# Supplementary material
Source: ML conference proceedings conference paper supplement (https://proceedings.mlr.press/v84/grover18b.html)
Supplement: Supplementary file [file grover18b-supp.pdf]

## Appendices

### A Unbiased noisy partial feedback

#### A.1 Proposition 1

*Proof.* By Lemma 1 applied to  $X_{i,t_1}, X_{i,t_2}, \dots$  for an arm  $i$  for  $F$  full delayed feedback, we have w.p.  $1 - \delta_f/n$ :

$$\left| \frac{1}{F} \sum_{f=1}^F X_{i,t_f} - \mu_i \right| \leq C(\sigma_i, F, \delta_f/n). \quad (7)$$

For any  $a$ ,  $E[Y_{i,t_F+p}|X_{i,t_F} = a] = a$ , and  $E[Y_{i,t_F+p} - a|X_{i,t_F} = a] = 0$ . Conditioned on  $X_{i,t_F} = a$ ,  $(Y_{i,t_F+p} - a)|(X_{i,t_F} = a)$  is sub-Gaussian by assumption.

Therefore, conditioned on  $X_{i,t_F} = a$ , by Lemma 1 applied to  $\frac{1}{P} \sum_{p=1}^P (Y_{i,t_F+p}|X_{i,t_F} = a) - a$  for an arm  $i$  computed using  $P$  partial feedback for the  $F$ -th pull, we have w.p.  $1 - \delta_p/n$ :

$$\left| \frac{1}{P} \sum_{p=1}^P Y_{i,t_F+p} - a \right| \leq C(\sigma_i^{(p)}, P, \delta_p/n). \quad (8)$$

Given that the result does not depend on the value  $a$ , we have:

$$\left| \frac{1}{P} \sum_{p=1}^P (Y_{i,t_F+p}|X_{i,t_F}) - X_{i,t_F} \right| \leq C(\sigma_i^{(p)}, P, \delta_p/n). \quad (9)$$

From a union bound Eq. (7) and Eq. (9), we have w.p.  $1 - \delta_f/n - \delta_p/n$ :

$$\left| \frac{1}{F} \left[ \sum_{f=1}^{F-1} X_{i,t_f} + \frac{1}{P} \sum_{p=1}^P Y_{i,t_F+p} \right] - \mu_i \right| \leq C(\sigma_i, F, \delta_f/n) + \frac{1}{F} C(\sigma_i^{(p)}, P, \delta_p/n). \quad (10)$$

Union bounding Eq.(10) over all arms, we have w.p.  $1 - \delta_f - \delta_p$ :

$$\left| \frac{1}{F} \left[ \sum_{f=1}^{F-1} X_{i,t_f} + \frac{1}{P} \sum_{p=1}^P Y_{i,t_F+p} \right] - \mu_i \right| \leq C(\sigma_i, F, \delta_f/n) + \frac{1}{F} C(\sigma_i^{(p)}, P, \delta_p/n) \quad \forall i \in [1, n] \quad (11)$$

finishing the proof.  $\square$

#### A.2 Theorem 1

At any given time  $t \geq 1$ ,  $F \in \mathbb{N}$ ,  $P \in [1, D_F]$ , we observe  $F - 1$  full feedback,  $X_{i,t_1, F-1}$  for an arbitrary arm  $i \in [1, n]$ . Accordingly, we have the following two cases to consider as per Algorithm 2.

- **Case (a):**  $C(\sigma_i, F - 1, \delta/n) < C(\sigma_i, F, \delta_f^*/n) + \frac{1}{F} C(\sigma_i^{(p)}, P, \delta_p^*/n)$

$$\hat{\mu}_i = \frac{1}{F-1} \sum_{f=1}^{F-1} X_{i,t_f}$$

$$C_i = C(\sigma_i, F - 1, \delta/n).$$

- **Case (b):** otherwise

$$\hat{\mu}_i = \frac{1}{F} \left[ \sum_{f=1}^{F-1} X_{i,t_f} + \frac{1}{P} \sum_{l=1}^P Y_{i,t_F+l} \right]$$

$$C_i = C(\sigma_i, F, \delta_f^*/n) + \frac{1}{F} C(\sigma_i^{(p)}, P, \delta_p^*/n).$$

Define  $\mathcal{E}_i = \{\forall t \geq 1, |\widehat{\mu}_i - \mu_i| \leq C_i\}$  be the event that the lower and upper confidence bounds of arm  $i$  trap the true mean  $\mu_i$  for all  $t \geq 1$  where  $\widehat{\mu}_i$  and  $C_i$  are chosen as described above at time  $t$ . Let  $S_t, A_t, R_t$  denote the set of surviving, accepted, and rejected arms at time  $t$ . We can then state and prove the following lemma.

**Lemma 2.** *Assume  $\mathcal{E}_i$  holds for an arbitrary arm  $i \in S_t$  and  $i \notin S_{t+1}$ . Then, the following statements hold:*

- $i \in A_{t+1}$  if  $i \leq k$ .
- $i \in R_{t+1}$  if  $i > k$ .

*Proof.* By definition,  $S_{t+1} \cup A_{t+1} \cup R_{t+1} = S_t$ . Recursing over  $t, t-1, \dots, 0$ , we note that  $S_{t+1} \cup A_{t+1} \cup R_{t+1} = \{1, 2, \dots, n\}$ . Since the lemma assumes that arm  $i \notin S_{t+1}$ , either  $i \in A_{t+1}$  or  $i \in R_{t+1}$ .

We will prove the first statement of the lemma by contradiction. For an arbitrary  $i \leq k$ , let us assume  $i \in R_{t+1}$ . This implies that  $UCB_i < \max_{j \in S_t}^{(k)} LCB_j$ . Since by assumptions on the lemma the lower and upper confidence bounds of any arm trap its true mean, we have  $UCB_i \geq \mu_i$  and  $\max_{j \in S_t}^{(k)} LCB_j \leq \mu_k$ . Hence, we obtain  $\mu_i < \mu_k$  which is a contradiction since  $i \leq k$ . The second statement holds true by symmetry.  $\square$

Since both Proposition 1 and Eq. (5) hold true w.p. at least  $1 - \delta/n$  for all arms, we get that  $\cap_{i=1}^n \mathcal{E}_i$  holds true w.p. at least  $1 - \delta$  (union bound) regardless of the set of  $\{\widehat{\mu}_i\}_{i=1}^n$  and  $\{C_i\}_{i=1}^n$  picked by the algorithm. Combining the union bound with Lemma 2, the algorithm outputs the top- $k$  set w.p. at least  $1 - \delta$  if it terminates.

## B Biased noisy partial feedback

### B.1 Proposition 2

*Proof.* By Lemma 1 applied to  $X_{i,t_1}, X_{i,t_2}, \dots$  for an arm  $i$  for  $F$  full delayed feedback, we have w.p.  $1 - \delta_f/n$ :

$$\left| \frac{1}{F} \sum_{f=1}^F X_{i,t_f} - \mu_i \right| \leq C(\sigma_i, F, \delta_f/n). \quad (12)$$

For any  $a$ ,  $E[Y_{i,t_F+p} | X_{i,t_F} = a] = a + b_i$ , and  $E[Y_{i,t_F+p} - a - b_i | X_{i,t_F} = a] = 0$ . Conditioned on  $X_{i,t_F} = a$ ,  $(Y_{i,t_F+p} - a - b_i) | (X_{i,t_F} = a)$  is sub-Gaussian by assumption. Therefore, conditioned on  $X_{i,t_F} = a$ , by Lemma 1 applied to  $\frac{1}{P} \sum_{p=1}^P (Y_{i,t_F+p} - b_i) - X_{i,t_F}$  for the (incomplete)  $F$ -th pull of an arm  $i$  with  $P$  partial feedback, we have w.p.  $1 - \delta_p/n$ :

$$\left| \frac{1}{P} \sum_{p=1}^P (Y_{i,t_F+p} - b_i) - X_{i,t_F} \right| \leq C(\sigma_i^{(p)}, P, \delta_p/n). \quad (13)$$

Now, consider the  $F - 1$  random variables for all  $f \in [1, F - 1]$ :

$$\frac{\sum_{p=1}^{D_f-1} Y_{i,t_f+p}}{D_f - 1} - X_{i,f}. \quad (14)$$

The random variables in (14) are all sub-Gaussian with mean  $b_i$  and scale parameter  $\sigma_i^{(p)}$ . Hence, applying LIL on these random variables conditioning on  $b_i$ , we have w.p.  $1 - \delta_b/n$ :

$$\left| \frac{1}{F-1} \sum_{f=1}^{F-1} \left( \frac{\sum_{p=1}^{D_f-1} Y_{i,t_f+p}}{D_f - 1} - X_{i,D_f-1} \right) - b_i \right| \leq C(\sigma_i^{(p)}, F-1, \delta_b/n). \quad (15)$$

From a union bound of Eq. (12) and Eq. (13), we have w.p.  $1 - \delta_f/n - \delta_p/n$ :

$$\left| \frac{1}{F} \left[ \sum_{f=1}^{F-1} X_{i,t_f} + \frac{1}{P} \sum_{p=1}^P (Y_{i,t_F+p} - b_i) \right] - \mu_i \right| \leq C(\sigma_i, F, \delta_f/n) + \frac{1}{F} C(\sigma_i^{(p)}, P, \delta_p/n). \quad (16)$$

---

**Algorithm 4** RacingBiasedPF (arm parameters  $\{i, \sigma_i, \sigma_i^{(p)}\}_{i=1}^n$ , top  $k$ , confidence  $\delta$ )

---

- 1: Initialize global time step  $t = 0$ , surviving  $S = \{i\}_{i=1}^n$ , accepted  $A = \{\}$ , rejected  $R = \{\}$ .
- 2: Initialize per-arm full delayed feedback counter  $F_i = 0$ , empirical means  $\hat{\mu}_i = 0$ , confidence bounds  $LCB_i = -\infty$ ,  $UCB_i = \infty$  for all  $i \in S$ .
- 3: **while**  $S$  is not empty **do**
- 4:     **while** True **do**
- 5:         Increment  $t \leftarrow t + 1$ .
- 6:         Collect partial feedback  $Y_{a,t}$ .
- 7:         Update  $\hat{\mu}^{(p)}$  using  $Y_{a,t}$  as per Proposition 2.
- 8:         Increment  $P \leftarrow P + 1$ .
- 9:         Set  $C^{(partial)} \leftarrow C(\sigma_a, F_a + 1, \delta_f^*/n) + \frac{1}{F_a + 1} \left[ C(\sigma_a^{(p)}, P, \delta_p^*/n) + C(\sigma_a^{(p)}, F_a, \delta_b^*/n) \right]$
- 10:         Choose FOrP  $\leftarrow \arg \min (C(\sigma_a, F_a, \delta/n), C^{(partial)})$ .
- 11:         Update  $C_a \leftarrow C(\sigma_a, F_a, \delta/n)$  if FOrP =  $F$  else  $C^{(partial)}$ .
- 12:         Update  $\hat{\mu}_a \leftarrow \hat{\mu}^{(f)}$  if FOrP =  $F$  else  $\frac{F_a \hat{\mu}^{(f)} + \hat{\mu}^{(p)}}{F_a + 1}$ .
- 13:         Update  $LCB_a, UCB_a$ .
- 14:          $A, R, S \leftarrow \text{UpdateArmSets}(A, R, S, k, \{LCB_i, UCB_i\}_{i \in S})$ .
- 15:         **if**  $P = D_{a,t_a}$  or  $a \notin S$  **then**
- 16:             Break ▷ Pull on termination/elimination
- 17:         **end if**
- 18:     **end while**
- 19:     Pull arm  $a$  where  $a \leftarrow \arg \min_{a \in S} F_a$ .
- 20:     Initialize start  $t_a \leftarrow t$ , partial feedback counter  $P = 0$ , partial mean  $\hat{\mu}^{(p)} = 0$ , full mean  $\hat{\mu}^{(f)} \leftarrow \hat{\mu}_i$ .
- 21: **end while**
- 22: **return**  $A$

---

From a union bound of Eq. (15) and Eq. (16), we have w.p.  $1 - \delta_f/n - \delta_p/n - \delta_b/n$ :

$$\left| \frac{1}{F} \left[ \sum_{f=1}^{F-1} X_{i,t_f} + \frac{1}{P} \sum_{p=1}^P \left( Y_{i,t_{F+p}} - \frac{1}{F-1} \sum_{f=1}^{F-1} \left( \frac{\sum_{p=1}^{D_f-1} Y_{i,t_f+p}}{D_f-1} - X_{i,D_f-1} \right) \right) \right] - \mu_i \right| \leq C(\sigma_i, F, \delta_f/n) + \frac{1}{F} C(\sigma_i^{(p)}, P, \delta_p/n) + \frac{1}{F} C(\sigma_i^{(p)}, F-1, \delta_b/n). \quad (17)$$

Finally, union bounding Eq. (17) over all arms, we have w.p.  $1 - \delta_f - \delta_p - \delta_b$ :

$$\left| \frac{1}{F} \left[ \sum_{f=1}^{F-1} X_{i,t_f} + \frac{1}{P} \sum_{p=1}^P \left( Y_{i,t_{F+p}} - \frac{1}{F-1} \sum_{f=1}^{F-1} \left( \frac{\sum_{p=1}^{D_f-1} Y_{i,t_f+p}}{D_f-1} - X_{i,D_f-1} \right) \right) \right] - \mu_i \right| \leq C(\sigma_i, F, \delta_f/n) + \frac{1}{F} C(\sigma_i^{(p)}, P, \delta_p/n) + \frac{1}{F} C(\sigma_i^{(p)}, F-1, \delta_b/n) \quad \forall i \in [1, n] \quad (18)$$

finishing the proof. □

## B.2 Algorithm

We provide the pseudocode for the racing procedures with biased partial feedback in Algorithm 4. As discussed previously, the algorithm is similar to Algorithm 2 with key differences in the mean and confidence bound estimators in Line 7 and Line 9 respectively.
